# Supplementary material for: Putting Beta-Diversity on the Map: Broad-Scale Congruence and Coincidence in the Extremes
Source: PLOS journal article supplement (doi:10.1371/journal.pbio.0050272), 2007-10-05
Supplement: S3 (10.1371/journal.pbio.0050272.s003) [file journal.pbio.0050272.s003]

**Table S3.** Correlations in Average Nearest-Neighbor Beta-Diversity ( $\beta_{sim}$ ) within the Western Hemisphere, Nearctic Realm, and Neotropical Realm

|                    | Amphibians and birds |       |        | Amphibians and mammals |       |       | Birds and mammals |       |        |
|--------------------|----------------------|-------|--------|------------------------|-------|-------|-------------------|-------|--------|
|                    | $\rho$               | $n$   | $ess$  | $\rho$                 | $n$   | $ess$ | $\rho$            | $n$   | $ess$  |
| Western Hemisphere | 0.325**              | 3,693 | 218.88 | 0.484**                | 3,693 | 99.49 | 0.512**           | 3,821 | 106.71 |
| Nearctic Realm     | 0.103                | 1,744 | 90.33  | 0.417*                 | 1,744 | 32.98 | 0.370*            | 1,862 | 59.01  |
| Neotropical Realm  | 0.645**              | 1,878 | 87.28  | 0.596**                | 1,878 | 48.08 | 0.627**           | 1,888 | 46.19  |

\*\*  $P < 0.001$ , \*  $P < 0.05$

Spearman rank correlation coefficients ( $\rho$ ), number of grid cells ( $n$ ), and corrected sample size ( $ess$ ) from each pair-wise comparison are shown.
